# Supplementary material for: Global detection of rainfall triggered landslide clusters
Source: Copernicus journal article supplement (doi:10.5194/nhess-2018-391), 2019-01-25
Supplement: Supplementary file 1 [file nhess-2018-391-supplement.pdf]

**Supplementary material for**

## **Global detection of rainfall triggered landslide clusters**

Susanne A. Benz<sup>1,2</sup>, Philipp Blum<sup>1</sup>

<sup>1</sup> Karlsruhe Institute of Technology (KIT), Institute of Applied Geosciences (AGW), Karlsruhe, Germany

<sup>2</sup> University of California San Diego (UCSD), School of Global Policy and Strategy (GPS), La Jolla, CA, USA

1 Table

9 Figures

10 Pages

*Correspondence to:* Philipp Blum (blum@kit.edu) and Susanne A. Benz (saben@ucsd.edu)

**Table S1.** All identified clusters. Clusters are grouped according to year (grey and white) and location. Area is area of the convex hull.

| Location                  | # Events       | From | To      | Duration [days] | Area [km <sup>2</sup> ] | ID      |    |
|---------------------------|----------------|------|---------|-----------------|-------------------------|---------|----|
| West Coast, North America | Washington, US | 44   | 09. Dec | 15. Dec 10      | 7                       | 38,699  | 1  |
|                           | California, US | 28   | 19. Dec | 22. Dec 10      | 4                       | 49,494  | 2  |
|                           | Oregon, US     | 51   | 13. Jan | 21. Jan 11      | 9                       | 126,346 | 3  |
|                           | Oregon, US     | 15   | 26. Feb | 02. Mar 11      | 5                       | 15,049  | 4  |
|                           | Washington, US | 35   | 06. Mar | 20. Mar 11      | 15                      | 30,224  | 5  |
|                           | California, US | 28   | 23. Mar | 27. Mar 11      | 5                       | 9,679   | 6  |
|                           | Oregon, US     | 59   | 18. Jan | 03. Feb 12      | 17                      | 96,298  | 7  |
|                           | Oregon, US     | 18   | 12. Mar | 17. Mar 12      | 6                       | 15,832  | 8  |
|                           | Oregon, US     | 14   | 30. Mar | 03. Apr 12      | 5                       | 9,948   | 9  |
|                           | Oregon, US     | 17   | 17. Nov | 22. Nov 12      | 6                       | 27,231  | 10 |
|                           | Oregon, US     | 19   | 30. Nov | 05. Dec 12      | 6                       | 61,073  | 11 |
|                           | Oregon, US     | 21   | 16. Dec | 26. Dec 12      | 11                      | 34,199  | 12 |
|                           | Oregon, US     | 43   | 09. Feb | 21. Feb 14      | 13                      | 238,602 | 13 |
|                           | Washington, US | 28   | 25. Feb | 08. Mar 14      | 12                      | 44,817  | 14 |
|                           | Oregon, US     | 37   | 18. Dec | 25. Dec 14      | 8                       | 53,173  | 15 |
|                           | Washington, US | 13   | 04. Jan | 06. Jan 15      | 3                       | 14,781  | 16 |
|                           | Oregon, US     | 31   | 04. Feb | 12. Feb 15      | 9                       | 75,636  | 17 |
|                           | Oregon, US     | 132  | 04. Dec | 27. Dec 15      | 24                      | 123,399 | 18 |
|                           | Oregon, US     | 18   | 14. Jan | 27. Jan 16      | 14                      | 33,586  | 19 |
|                           | California, US | 20   | 11. Mar | 15. Mar 16      | 5                       | 58,030  | 20 |
|                           | Colorado, US   | 11   | 20. Jul | 20. Jul 16      | 1                       | 1       | 21 |
|                           | California, US | 39   | 04. Jan | 11. Jan 17      | 8                       | 143,868 | 22 |
|                           | California, US | 21   | 18. Jan | 24. Jan 17      | 7                       | 165,451 | 23 |
|                           | California, US | 10   | 19. Jan | 24. Jan 17      | 6                       | 2,532   | 24 |
|                           | Washington, US | 15   | 05. Feb | 09. Feb 17      | 5                       | 9,641   | 25 |
|                           | California, US | 13   | 06. Feb | 16. Feb 17      | 11                      | 899     | 26 |
|                           | California, US | 15   | 06. Feb | 17. Feb 17      | 12                      | 23,707  | 27 |
|                           | California, US | 23   | 18. Feb | 24. Feb 17      | 7                       | 32,913  | 28 |
|                           | Washington, US | 11   | 14. Mar | 20. Mar 17      | 7                       | 1,029   | 29 |

| Location                  |                             | # Events | From    | To         | Duration [days] | Area [km <sup>2</sup> ] | ID |
|---------------------------|-----------------------------|----------|---------|------------|-----------------|-------------------------|----|
| Central and Eastern USA   | Kentucky, US                | 25       | 02. May | 03. May 10 | 2               | 20,426                  | 30 |
|                           | Ohio, US                    | 11       | 08. Mar | 16. Mar 11 | 9               | 9,008                   | 31 |
|                           | Ohio, US                    | 10       | 25. Apr | 27. Apr 11 | 3               | 3,666                   | 32 |
|                           | Ohio, US                    | 11       | 03. May | 03. May 11 | 1               | 5,627                   | 33 |
|                           | Minnesota, US               | 11       | 18. Jun | 23. Jun 14 | 6               | 576                     | 34 |
|                           | West Virginia, US           | 13       | 02. Mar | 07. Mar 15 | 6               | 6,108                   | 35 |
|                           | Kentucky, US                | 14       | 10. Apr | 20. Apr 15 | 11              | 55,773                  | 36 |
|                           | West Virginia, US           | 12       | 21. Feb | 27. Feb 16 | 7               | 85,675                  | 37 |
| South and Central America | Rio de Janeiro, Brazil      | 111      | 05. Apr | 07. Apr 10 | 3               | 2,604                   | 38 |
|                           | Guatemala, Guatemala        | 11       | 26. May | 30. May 10 | 5               | 2,457                   | 39 |
|                           | Distrito Federal, Venezuela | 12       | 26. Nov | 30. Nov 10 | 5               | 111                     | 40 |
|                           | Rio de Janeiro, Brazil      | 20       | 12. Jan | 12. Jan 11 | 1               | 1,420                   | 41 |
|                           | Atlántico Sur, Nicaragua    | 14       | 23. Jun | 23. Jun 14 | 1               | 7                       | 42 |
| Himalaya                  | West Bengal, India          | 15       | 16. Aug | 20. Aug 09 | 5               | 746                     | 43 |
|                           | Jammu and Kashmir, India    | 13       | 30. Mar | 08. Apr 15 | 10              | 20,066                  | 44 |
|                           | West Bengal, India          | 10       | 27. Jun | 01. Jul 15 | 5               | 587                     | 45 |
|                           | Manipur, India              | 10       | 01. Aug | 01. Aug 15 | 1               | 503                     | 46 |
| South-East Asia           | Benguet, Philippines        | 23       | 03. Oct | 09. Oct 09 | 7               | 2,817                   | 47 |
|                           | Misamis Oriental, Ph.       | 14       | 24. Nov | 25. Nov 09 | 2               | 14,583                  | 48 |
|                           | Leyte, Philippines          | 10       | 16. Mar | 20. Mar 11 | 5               | 508                     | 49 |
|                           | Jawa Barat, Indonesia       | 10       | 18. Nov | 21. Nov 12 | 4               | 2,663                   | 50 |

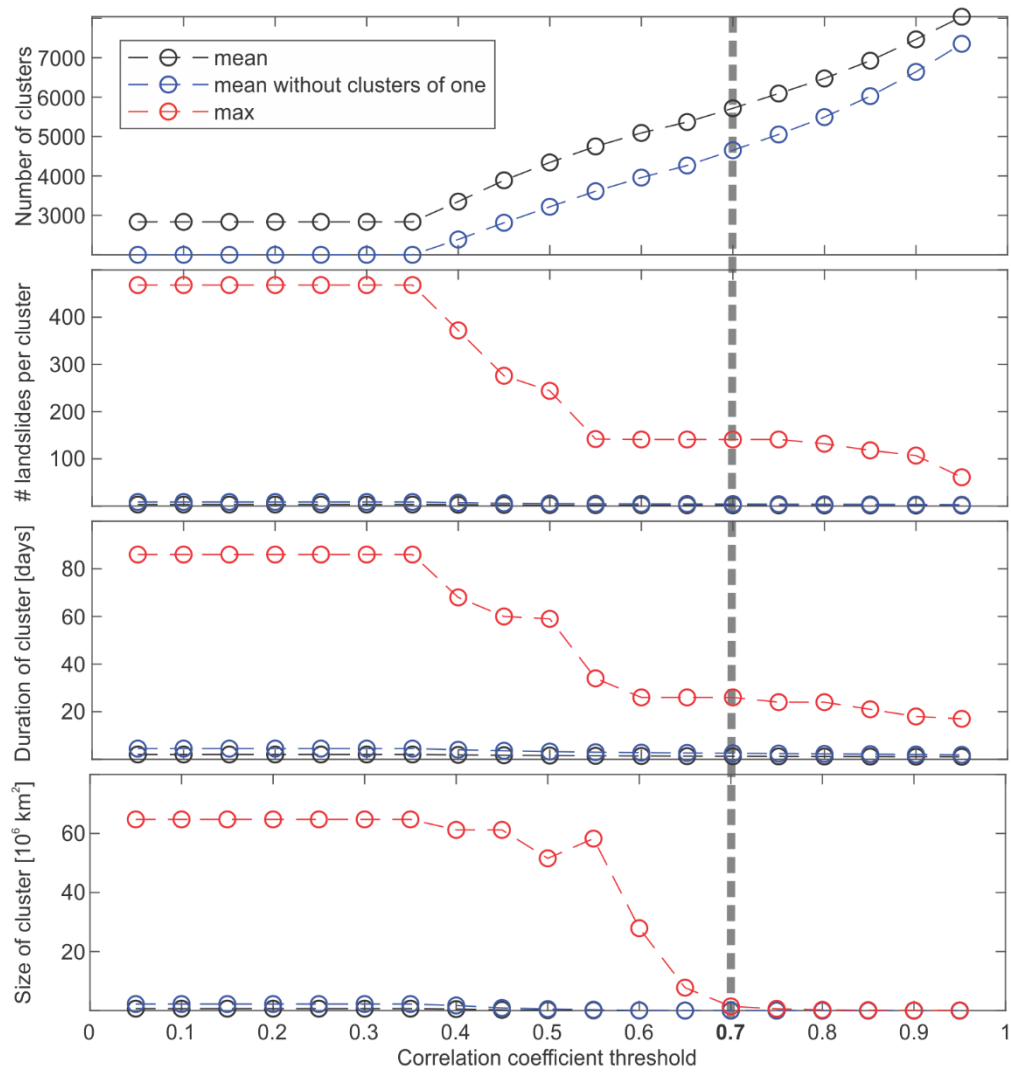

**Figure S1.** Impact of the chosen threshold for the spearman correlation coefficient on total number of clusters in the global landslide catalog, on the average number of landslides per cluster, on the average duration of landslide clusters, and on the average area of landslide clusters. In this study a threshold of 0.7 was chosen as from this point onwards maximums size of, duration of and landslides per cluster, becomes stable compared to the original values.

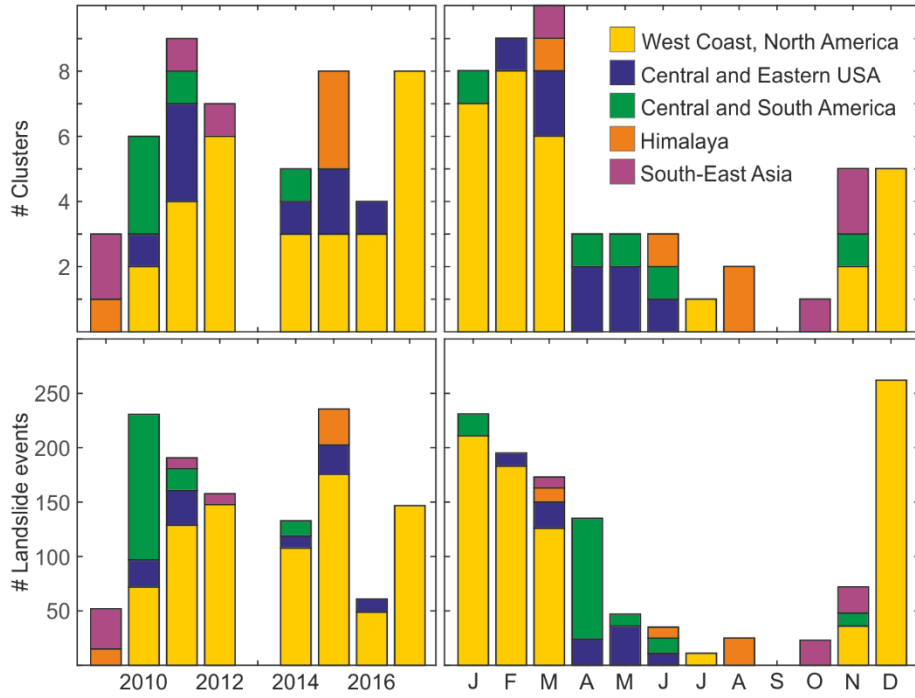

**Figure S2.** Recorded landslide clusters throughout the years and seasons for all of the 5 distinct regions.

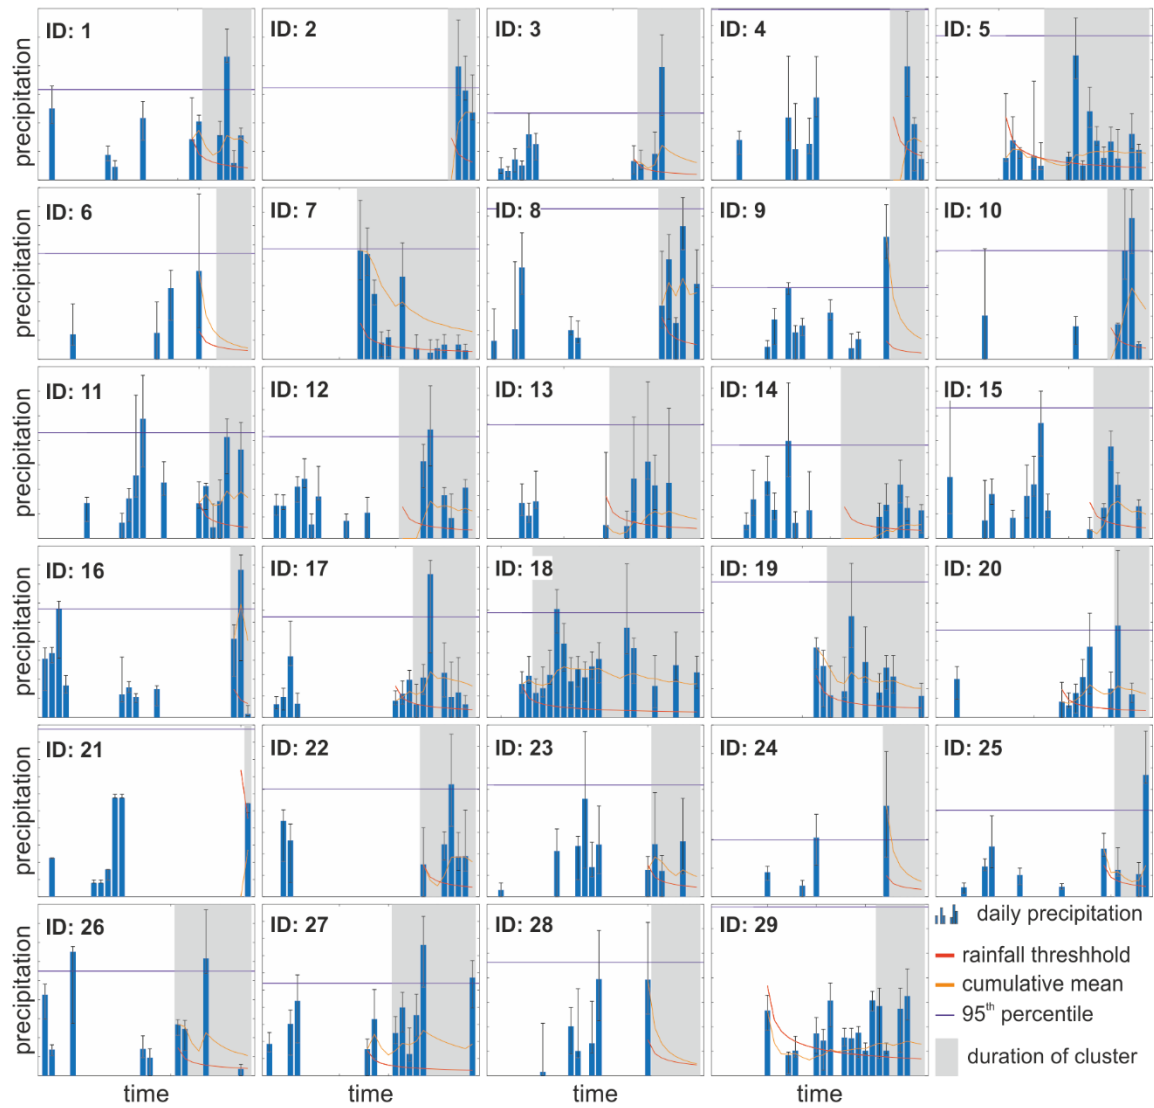

**Figure S3.** Median Rainfall (error bars show inner quartile range) in the 30 days preceding the last landslide event of the clusters located in the West Coast of North America. The blue line indicates the 95<sup>th</sup> percentile of rainfall (excluding rain-free days). Given in red is the global rainfall threshold (ID from Guzzetti et al. 2008) and in orange the cumulative mean for the rainfall event preceding the cluster.

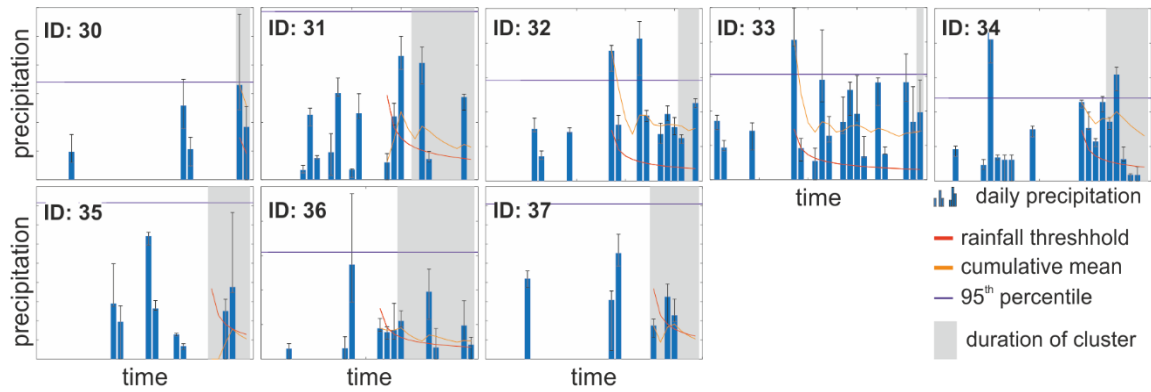

**Figure S4.** Rainfall in the 30 days preceding the last landslide event of the clusters located in Central and Eastern USA. The blue line indicates the 95<sup>th</sup> percentile of rainfall (excluding rain-free days). Given in red is the global rainfall threshold (ID from Guzzetti et al. 2008) and in orange the cumulative mean for the rainfall event preceding the cluster.

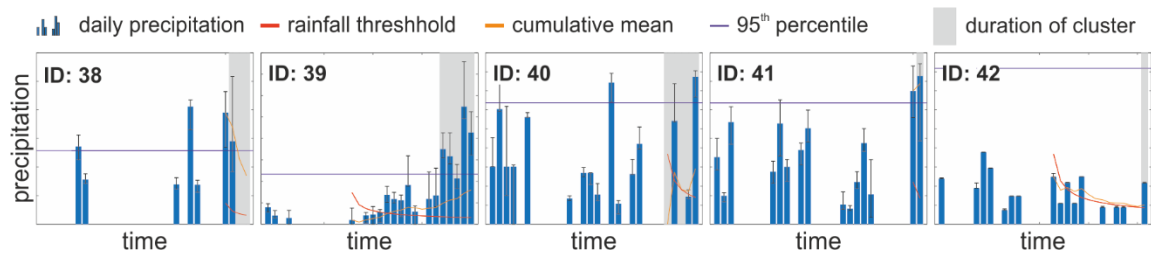

**Figure S5.** Rainfall in the 30 days preceding the last landslide event of the clusters located in Central and South America. The blue line indicates the 95<sup>th</sup> percentile of rainfall (excluding rain-free days). Given in red is the global rainfall threshold (ID from Guzzetti et al. 2008) and in orange the cumulative mean for the rainfall event preceding the cluster.

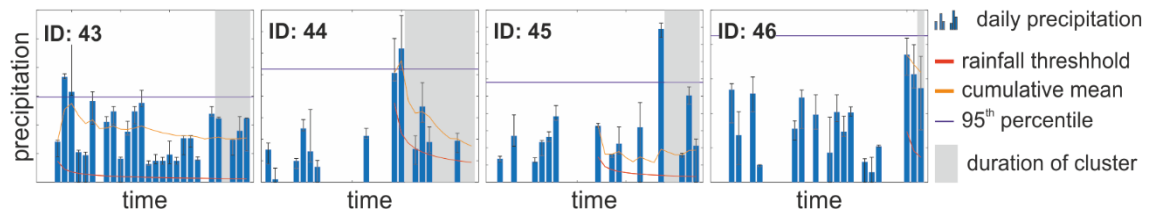

**Figure S6.** Rainfall in the 30 days preceding the last landslide event of the clusters located in the Himalaya Region. . The blue line indicates the 95<sup>th</sup> percentile of rainfall (excluding rain-free days). Given in red is the global rainfall threshold (ID from Guzzetti et al. 2008) and in orange the cumulative mean for the rainfall event preceding the cluster.

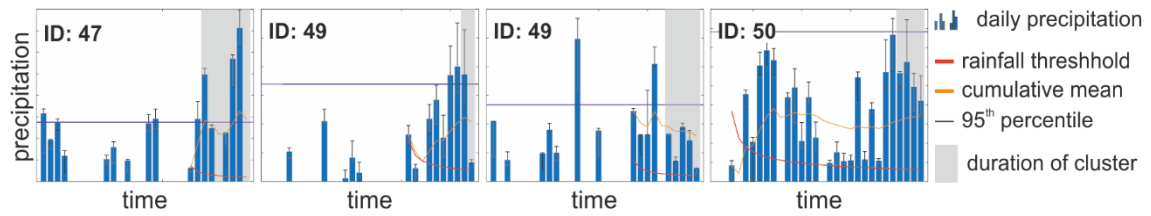

**Figure S7.** Rainfall in the 30 days preceding the last landslide event of the clusters located in the Philippines. The blue line indicates the 95<sup>th</sup> percentile of rainfall (excluding rain-free days). Given in red is the global rainfall threshold (ID from Guzzetti et al. 2008) and in orange the cumulative mean for the rainfall event preceding the cluster.



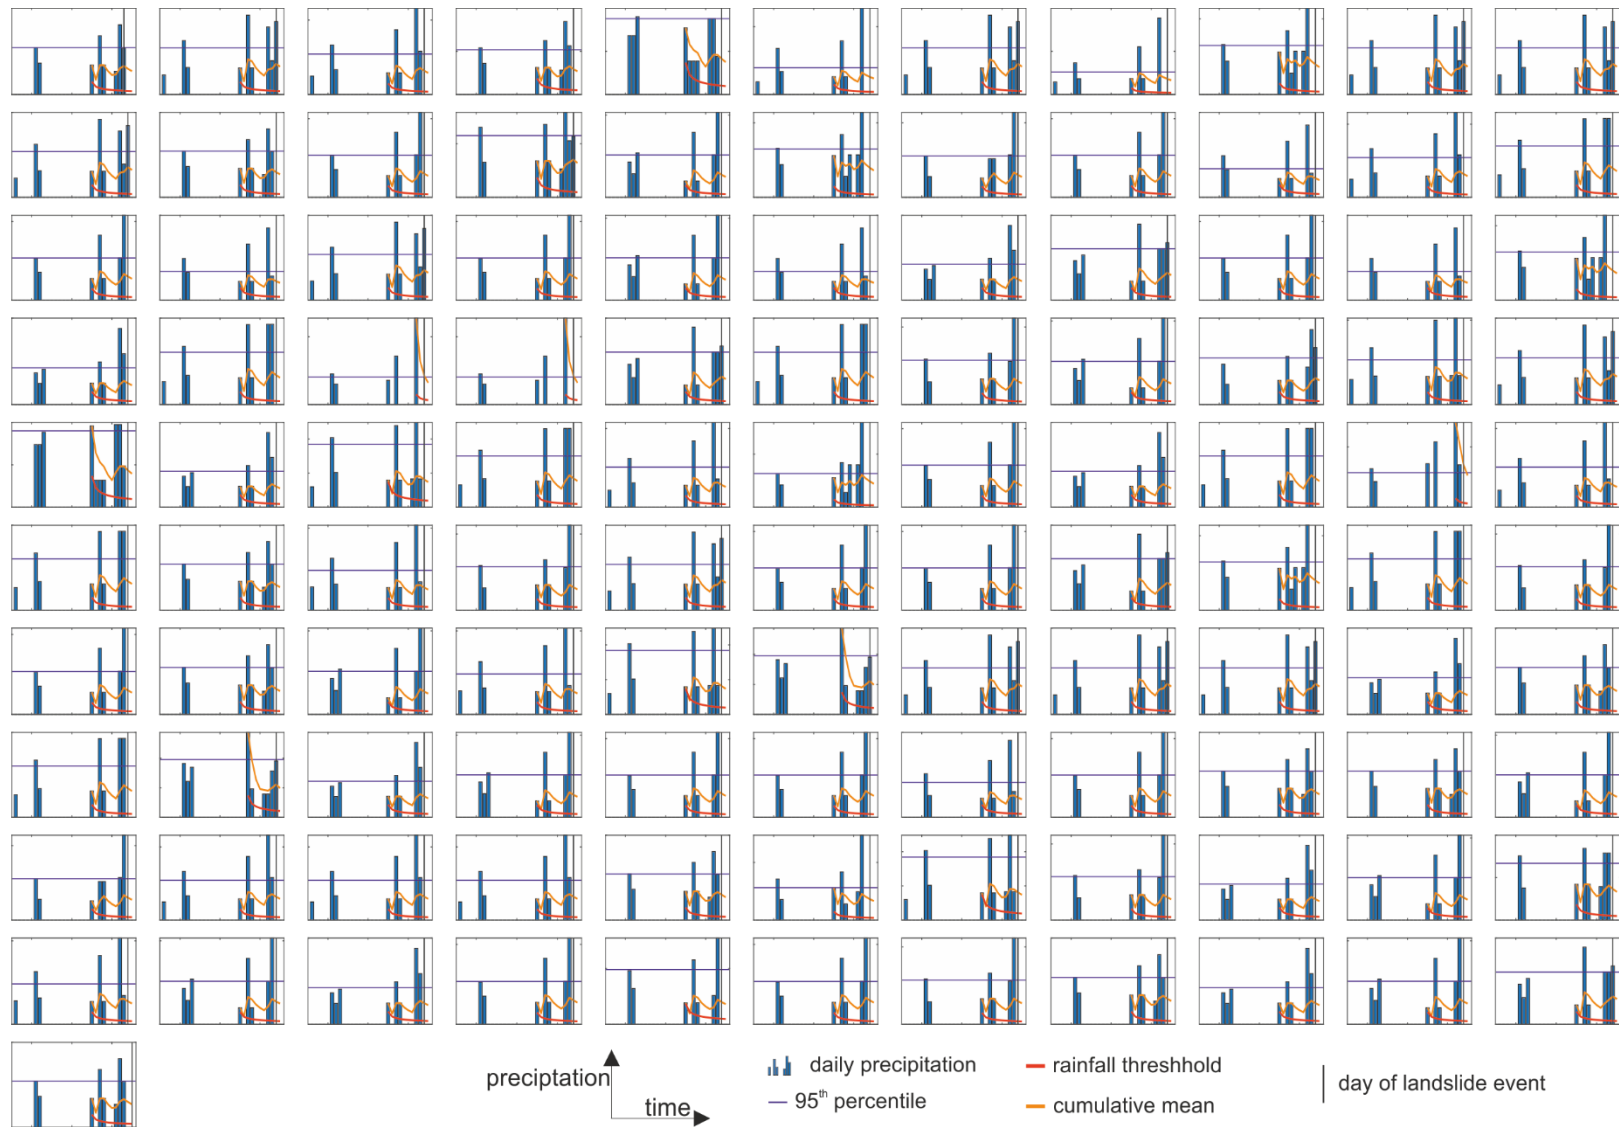

**Figure S8.** Rainfall at the location of all events associated with the cluster in Rio de Janeiro with the most events per day. Shown is daily precipitation of the 30 days preceding the last event of the cluster.

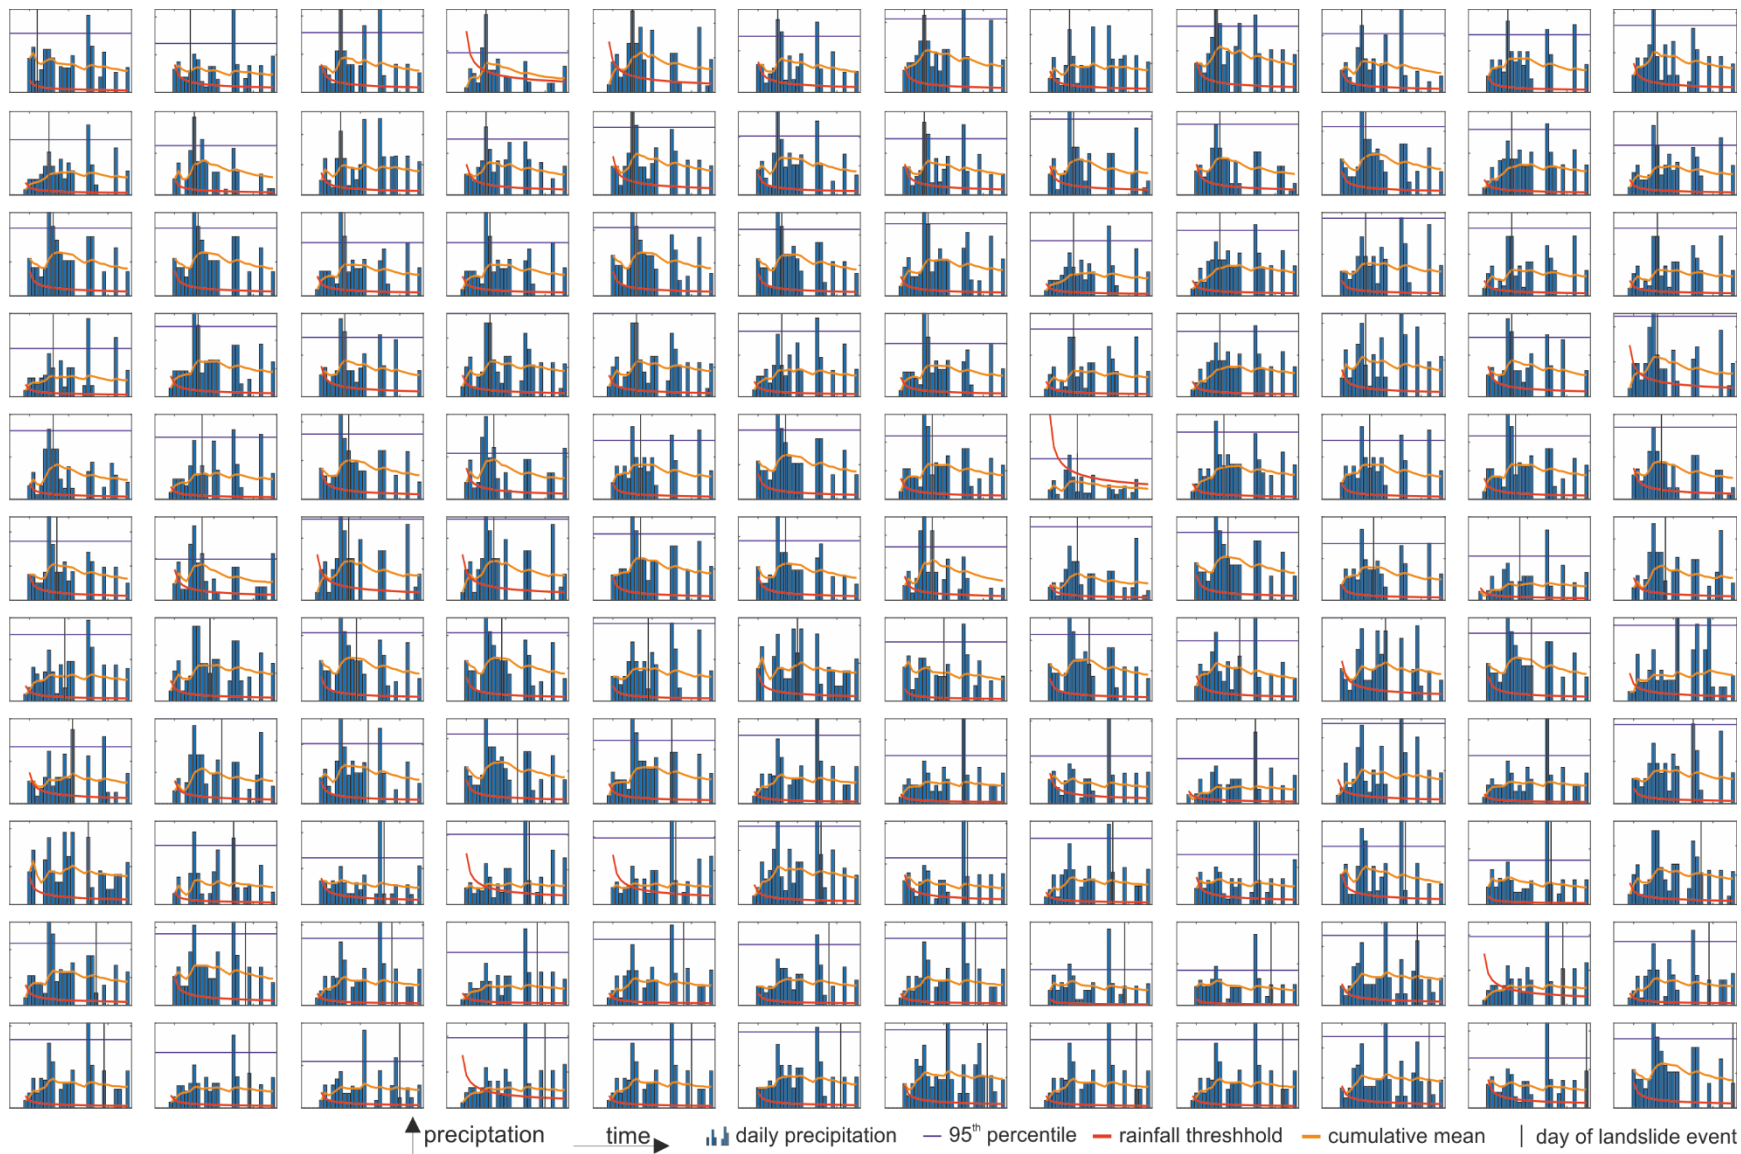

**Figure S9.** Rainfall at the location of all events associated with the longest Cluster (Oregon, USA). Shown is daily precipitation of the 30 days preceding the last event.
